# Supplementary material for: Self-assembled nanohelix from a bolaamphiphilic diacetylene via hydrogelation and selective responsiveness towards amino acids and nucleobases
Source: Royal Society of Chemistry journal article supplement (doi:10.1039/c7nr02126g), 2017-01-01

***Electronic Supplementary Information for***

**Self-assembled Nanohelix from a Bolaamphiphilic Diacetylene  
via Hydrogelation and Selective Responsiveness Towards  
Amino Acids and Nucleobases**

*Yan Meng,<sup>a,c</sup> Jian Jiang,<sup>\*b</sup> and Minghua Liu<sup>\*a,b,c</sup>*

<sup>a</sup>Beijing National Laboratory for Molecular Science, CAS Key Laboratory of Colloid, Interface, Chemical Thermodynamics, Institute of Chemistry, Chinese Academy of Sciences, No. 2 Zhongguancun Beiyijie, Beijing 100190, P. R. China. E-mail: liumh@iccas.ac.cn

<sup>b</sup> National center for Nanoscience and Technology, P. R. China. E-mail: jiangj@nanoctr.cn.

<sup>c</sup>University of Chinese Academy of Science, Beijing 100049, P. R. China

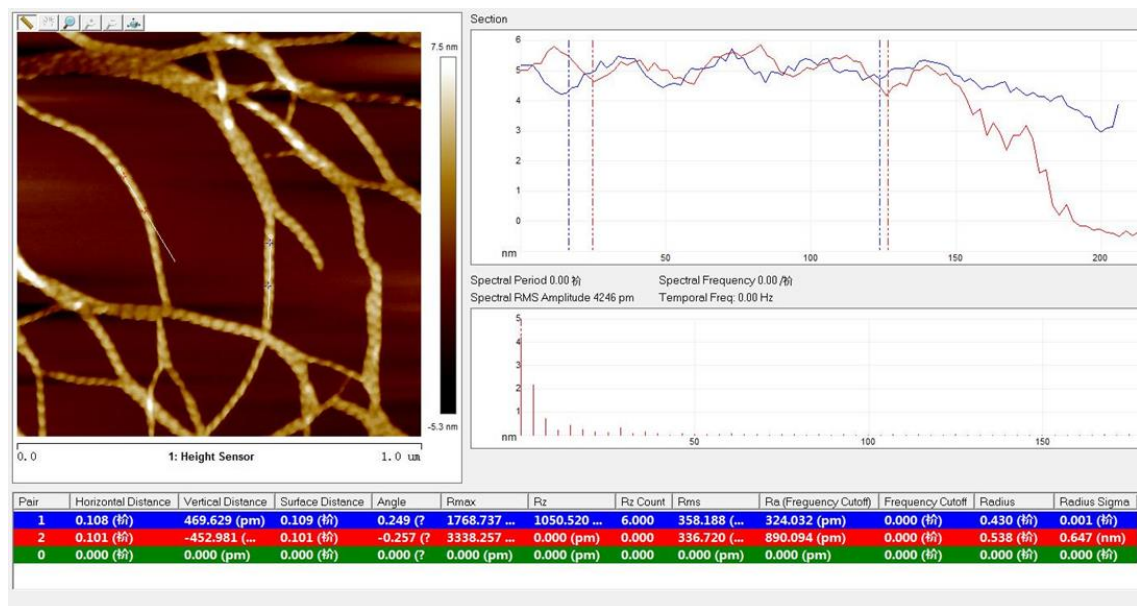

Figure S1 The pitch length of nanohelix: three pitches are about 101-108nm, which means the average length of every pitch is around 34-36 nm.

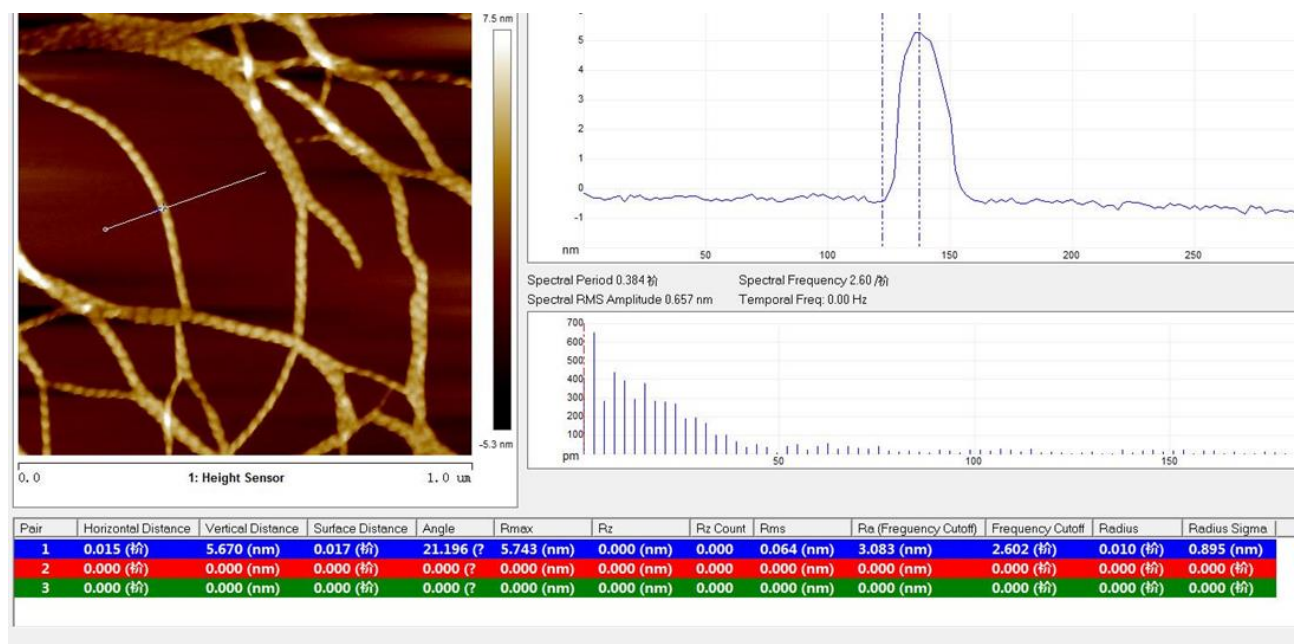

Figure S2 The height of nanohelix, which is about 5.7 nm.

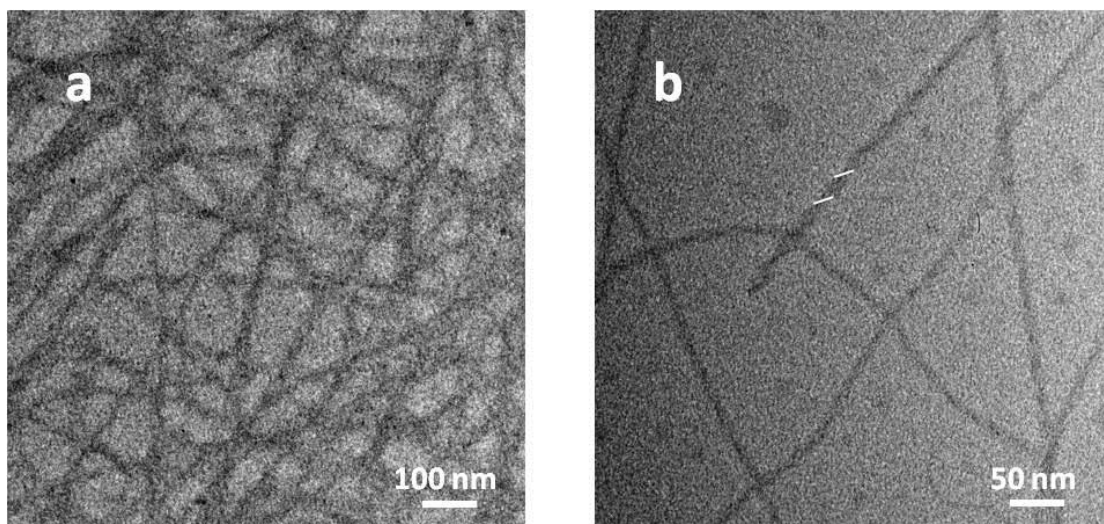

Figure S3 TEM image of a) L-DGA and b) D-DGA hydrogel.

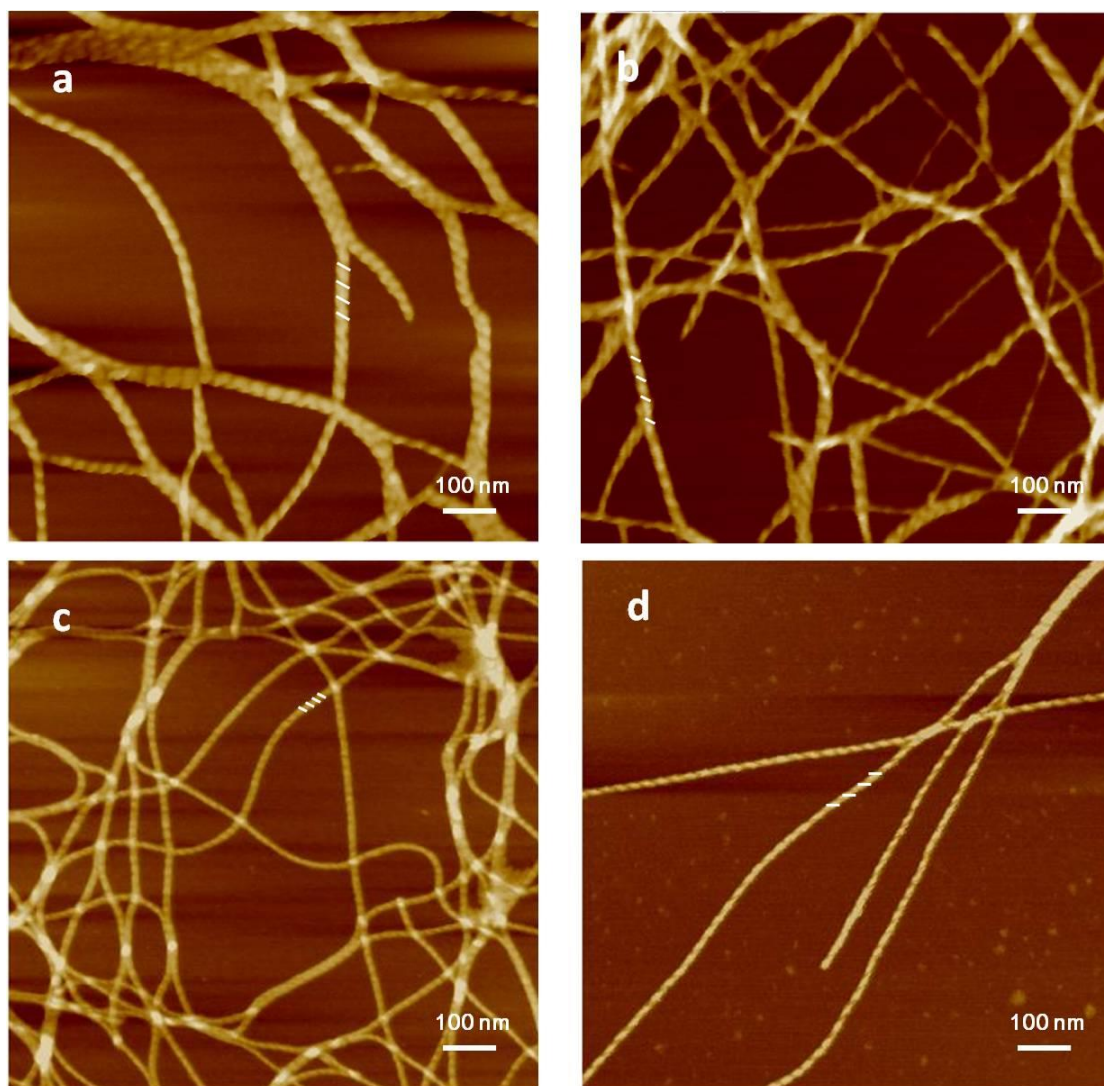

Figure S4 AFM images of L-DGA before a) and after b) polymerization; D-DGA before a) and after b) polymerization. Directions of helix shown in white lines.

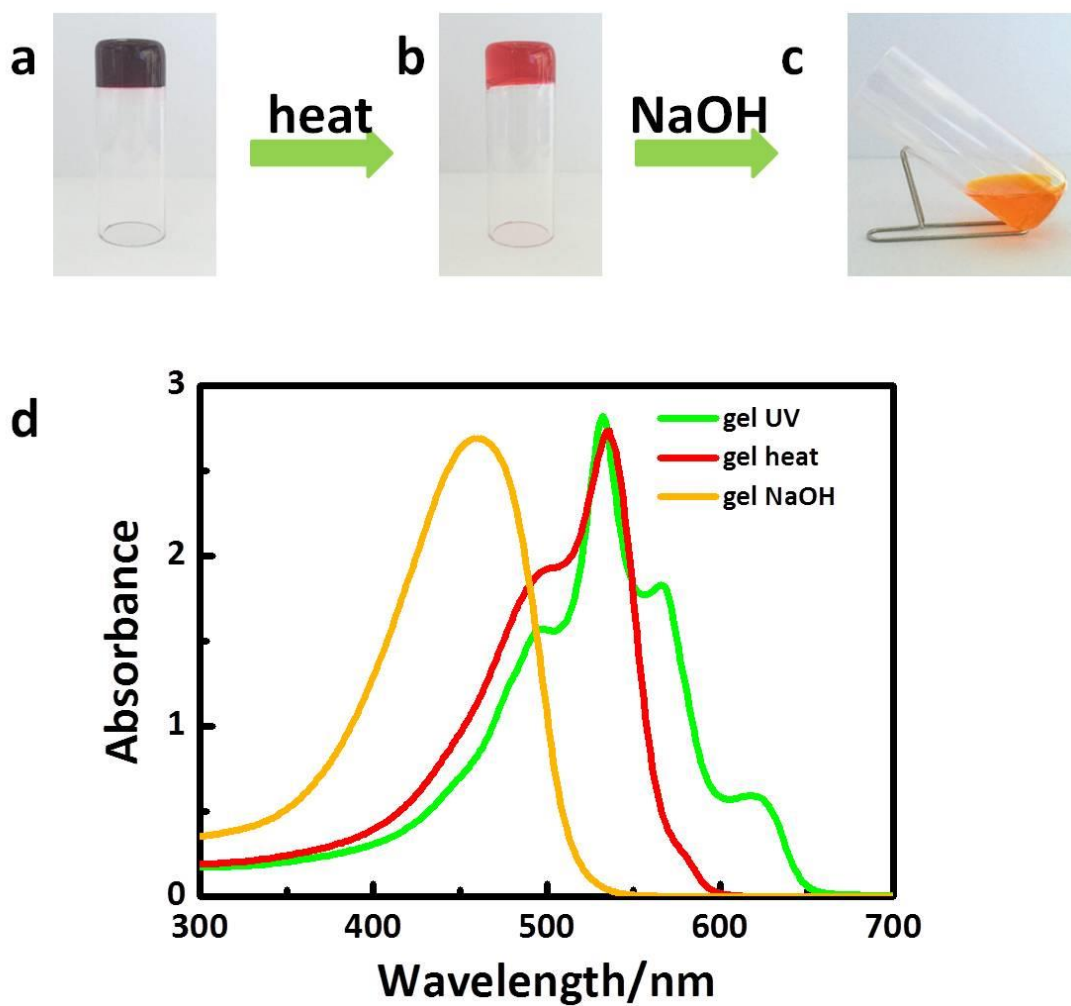

Figure S5 a) DGA hydrogel, b) After heating, turned into red gel, c) Addition of NaOH caused the gel into yellow aqueous solution. d) UV-Vis spectra in three states.

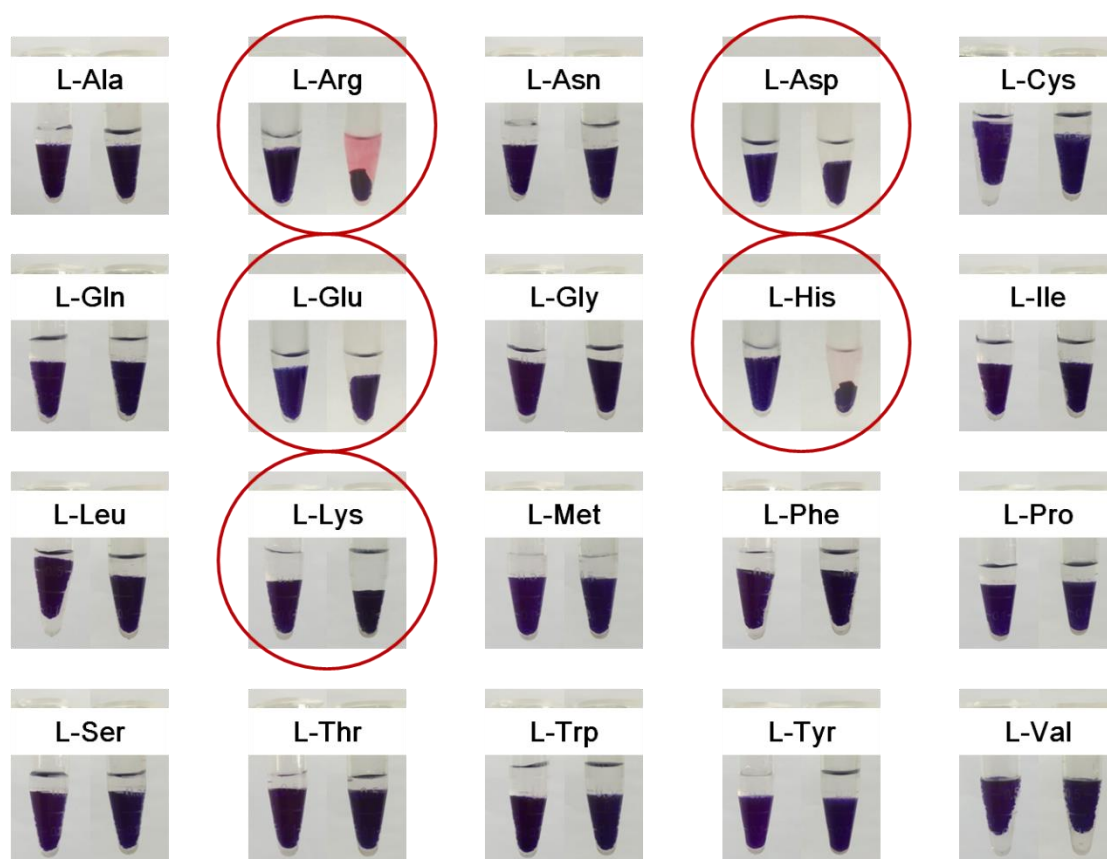

Figure S6 changes between hydrogels dipped in amino acids solutions.

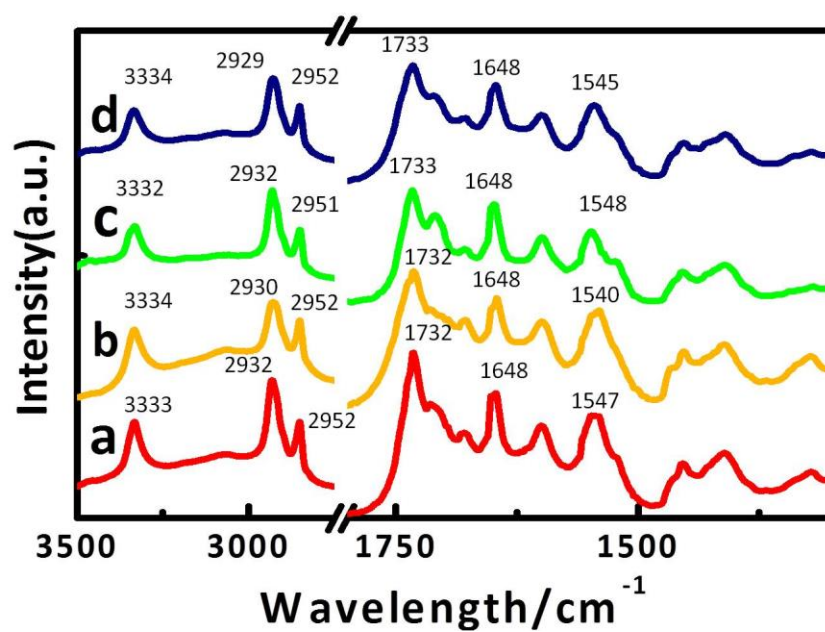

Figure S7 FT-IR spectra of hydrogel a) before and b) after polymerization; precipitation c) before and d) after polymerization.

# <sup>1</sup>H NMR spectra of DGA

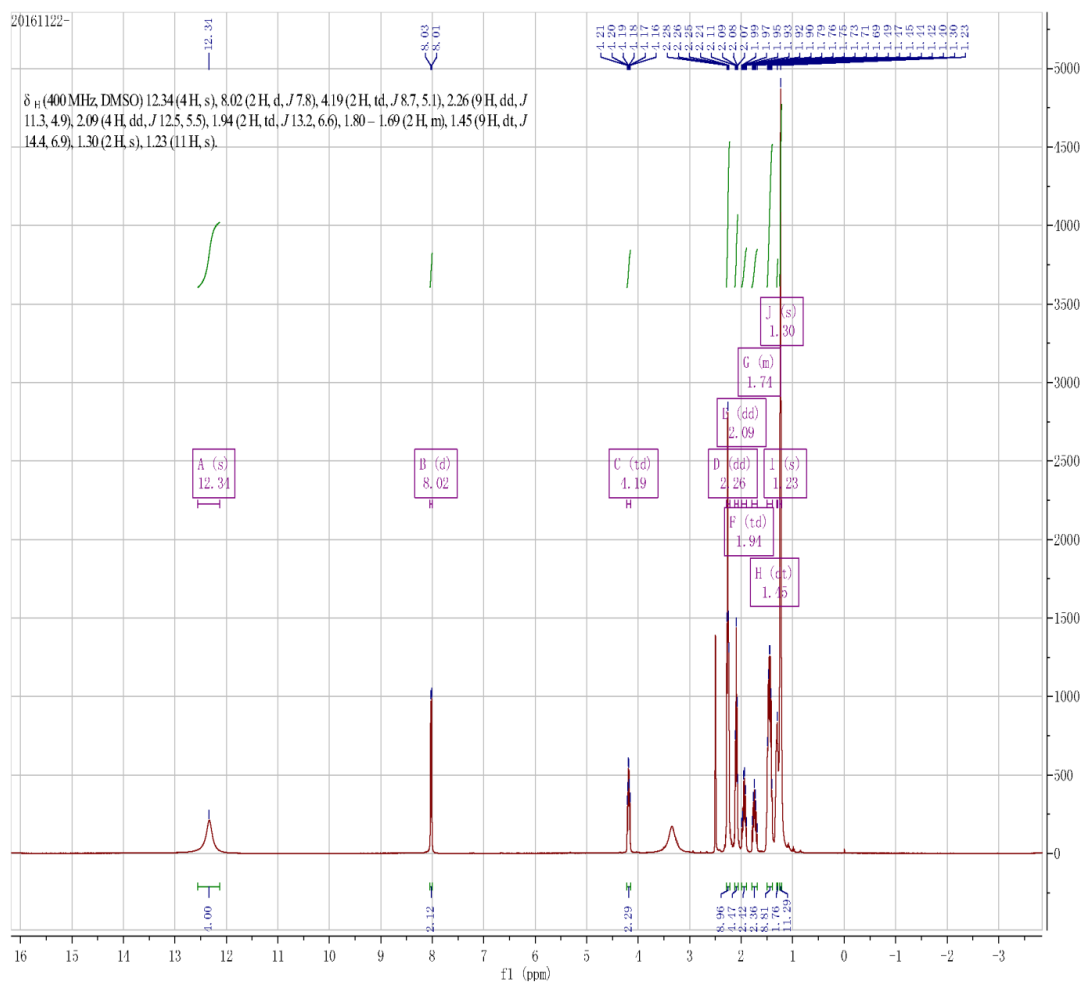

# <sup>13</sup>C NMR spectra of DGA

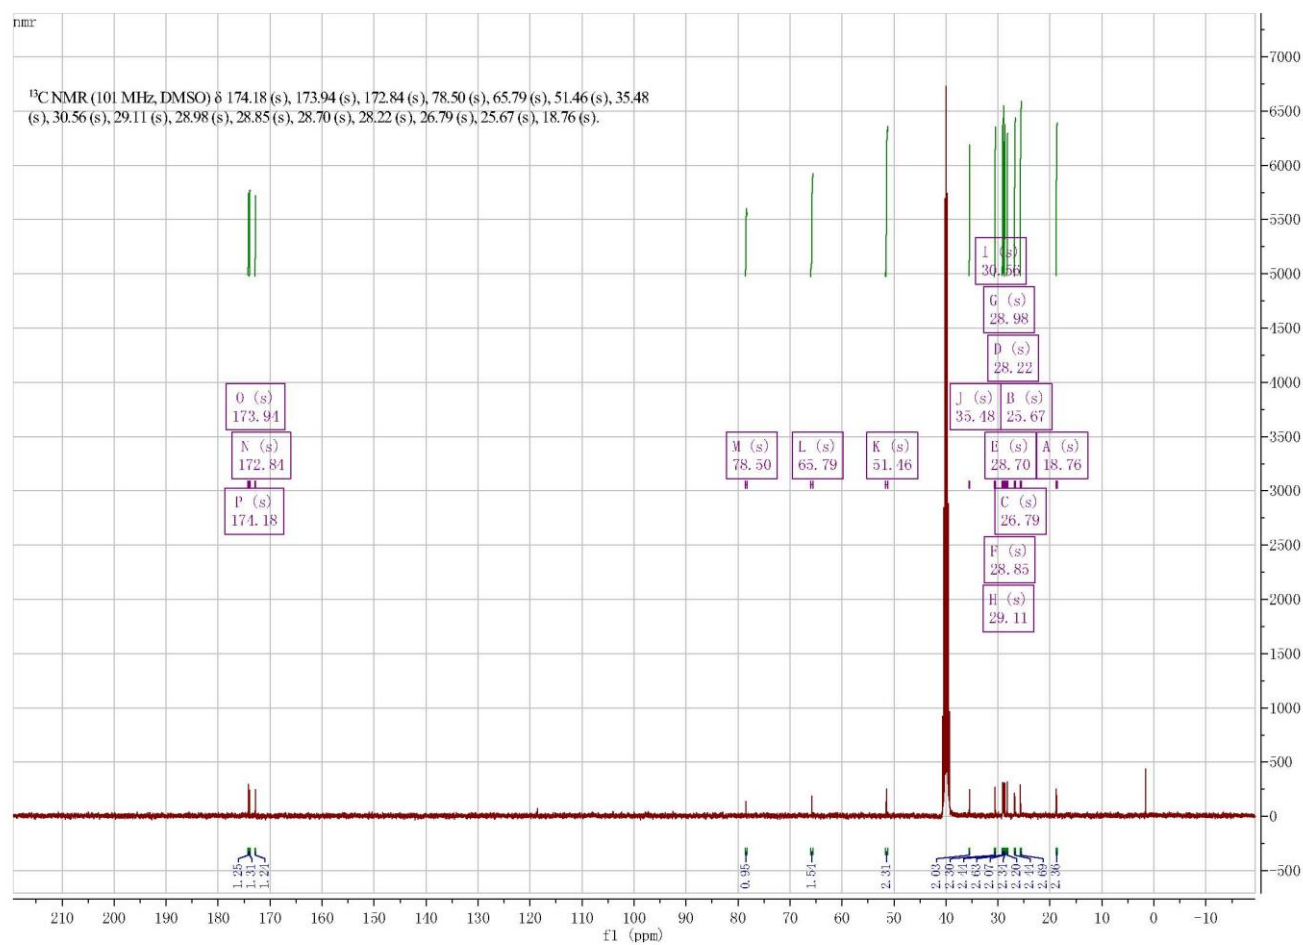

Supplement: c7nr02126g1.pdf [file c7nr02126g1.pdf]
